# Supplementary material
Source: PubMed Central journal article supplement (PMC3567728)
Supplement: 1dbe2afb3b4eb0dd71e42c7799ae5d33_genetics.112.147983-4.pdf [file 1dbe2afb3b4eb0dd71e42c7799ae5d33_genetics.112.147983-4.pdf]

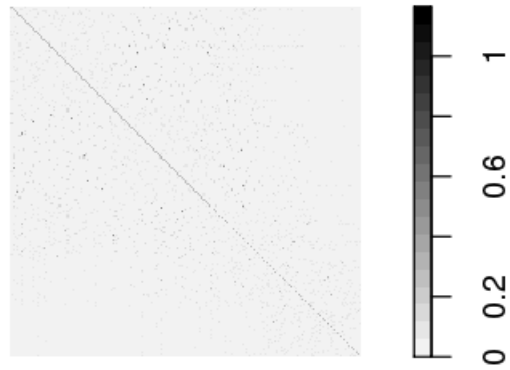

**Figure S1** Pedigree relationship heat map of the 2000 reference (top left) and 1500 validation (bottom left) individuals in replicate 1 of the simulated dataset
