# Supplementary material
Source: PubMed Central journal article supplement (PMC3567728)
Supplement: 7e461b8cdf3fc1ec3f64d3bdfa65fbeb_genetics.112.147983-3.pdf [file 7e461b8cdf3fc1ec3f64d3bdfa65fbeb_genetics.112.147983-3.pdf]

**Table S3 Length of chains, burn-in and hyper-parameters for Bayesian methods.**

| Method    | Length of Chain       | Burn-in            | $\pi$     | Effect dist. and parameters                           |
|-----------|-----------------------|--------------------|-----------|-------------------------------------------------------|
| BayesSSVS | 100,000               | 10,000             | 0.999     | Normal<br>Var estimated                               |
| BayesC    | 160,000<br>5,200,000* | 30,000<br>200,000* | Estimated | Normal<br>Var estimated                               |
| BayesB1   | 160,000<br>5,200,000* | 30,000<br>200,000* | Estimated | Scaled Student-t<br>df= estimated<br>Scale= estimated |
| BayesB2   | 5,200,000*            | 200,000*           | estimated | Scaled Student-t<br>df=4<br>Scale= estimated          |
| BayesA1   | 160,000               | 30,000             | -         | Scaled Student-t<br>df= estimated<br>Scale= estimated |
| BayesA2   | 5,200,000*            | 200,000*           | -         | Scaled Student-t<br>df= 4<br>Scale= estimated         |
| Lasso1    | 160,000<br>5,200,000* | 30,000<br>200,000* | -         | Laplace<br>rate=estimated                             |
| Lasso2    | 100,000               | 10,000             | -         | Laplace                                               |
| RR-BLUP   | 100,000               | 10,000             | 0.0       | Normal<br>Var estimated                               |

\* chain used for analysis of pine and wheat dataset
