# Supplementary material
Source: PubMed Central journal article supplement (PMC3567728)
Supplement: 9f1ba9046b279267c1532dae10408060_genetics.112.147983-2.pdf [file 9f1ba9046b279267c1532dae10408060_genetics.112.147983-2.pdf]

**Table S1 Accuracy of genomic prediction in simulated data estimated with different methods, where PLS is Partial Least Squares, BayesSSVS is Bayesian Stochastic Search Variable Selection, RR-BLUP is Ridge Regression, and BLUP (GBLUP) is (Genomic) Best Linear Unbiased Prediction.**

| Method       | Trait 1         |       |              |       |              |       |               |       |
|--------------|-----------------|-------|--------------|-------|--------------|-------|---------------|-------|
|              | All Generations |       | Generation 6 |       | Generation 8 |       | Generation 10 |       |
|              | cor             | se    | cor          | se    | cor          | se    | cor           | se    |
| Mean Genomic | 0.449           | 0.002 | 0.551        | 0.003 | 0.418        | 0.003 | 0.360         | 0.002 |
| PLS          | 0.431           | 0.011 | 0.530        | 0.011 | 0.398        | 0.016 | 0.348         | 0.015 |
| BayesSSVS    | 0.449           | 0.013 | 0.550        | 0.014 | 0.419        | 0.019 | 0.361         | 0.016 |
| BayesC       | 0.452           | 0.013 | 0.554        | 0.013 | 0.422        | 0.018 | 0.362         | 0.016 |
| BayesB1      | 0.451           | 0.013 | 0.553        | 0.012 | 0.420        | 0.018 | 0.362         | 0.016 |
| BayesA1      | 0.453           | 0.013 | 0.555        | 0.013 | 0.422        | 0.018 | 0.363         | 0.016 |
| Lasso1       | 0.453           | 0.013 | 0.555        | 0.013 | 0.422        | 0.018 | 0.363         | 0.016 |
| Lasso2       | 0.453           | 0.013 | 0.555        | 0.013 | 0.422        | 0.018 | 0.363         | 0.016 |
| RR-BLUP      | 0.453           | 0.013 | 0.555        | 0.013 | 0.422        | 0.018 | 0.363         | 0.016 |
| GBLUP        | 0.448           | 0.013 | 0.552        | 0.013 | 0.418        | 0.018 | 0.352         | 0.017 |
| BLUP         | 0.290           | 0.014 | 0.440        | 0.020 | 0.212        | 0.025 | 0.110         | 0.023 |

| Method       | Trait 2         |       |              |       |              |       |               |       |
|--------------|-----------------|-------|--------------|-------|--------------|-------|---------------|-------|
|              | All Generations |       | Generation 6 |       | Generation 8 |       | Generation 10 |       |
|              | cor             | se    | cor          | se    | cor          | se    | cor           | se    |
| Mean Genomic | 0.483           | 0.017 | 0.580        | 0.012 | 0.447        | 0.019 | 0.401         | 0.022 |
| PLS          | 0.424           | 0.011 | 0.527        | 0.014 | 0.387        | 0.021 | 0.331         | 0.016 |
| BayesSSVS    | 0.517           | 0.027 | 0.603        | 0.020 | 0.489        | 0.040 | 0.448         | 0.029 |
| BayesC       | 0.542           | 0.027 | 0.624        | 0.020 | 0.511        | 0.038 | 0.481         | 0.030 |
| BayesB1      | 0.544           | 0.027 | 0.624        | 0.021 | 0.517        | 0.038 | 0.482         | 0.029 |
| BayesA1      | 0.539           | 0.028 | 0.621        | 0.021 | 0.510        | 0.038 | 0.472         | 0.031 |
| Lasso1       | 0.447           | 0.013 | 0.558        | 0.012 | 0.405        | 0.023 | 0.352         | 0.017 |
| Lasso2       | 0.447           | 0.013 | 0.557        | 0.012 | 0.405        | 0.023 | 0.351         | 0.016 |
| RR-BLUP      | 0.447           | 0.016 | 0.558        | 0.013 | 0.405        | 0.026 | 0.354         | 0.020 |
| GBLUP        | 0.437           | 0.011 | 0.551        | 0.010 | 0.392        | 0.021 | 0.337         | 0.019 |
| BLUP         | 0.297           | 0.016 | 0.463        | 0.011 | 0.206        | 0.030 | 0.099         | 0.019 |

| Method       | Trait 3         |       |              |       |              |       |               |       |
|--------------|-----------------|-------|--------------|-------|--------------|-------|---------------|-------|
|              | All Generations |       | Generation 6 |       | Generation 8 |       | Generation 10 |       |
|              | cor             | se    | cor          | se    | cor          | se    | cor           | se    |
| Mean Genomic | 0.386           | 0.003 | 0.484        | 0.005 | 0.339        | 0.002 | 0.306         | 0.003 |
| PLS          | 0.366           | 0.009 | 0.447        | 0.016 | 0.325        | 0.018 | 0.304         | 0.018 |
| BayesSSVS    | 0.378           | 0.010 | 0.480        | 0.015 | 0.333        | 0.021 | 0.290         | 0.016 |
| BayesC       | 0.390           | 0.010 | 0.490        | 0.015 | 0.343        | 0.020 | 0.308         | 0.017 |
| BayesB1      | 0.383           | 0.009 | 0.483        | 0.015 | 0.338        | 0.020 | 0.298         | 0.015 |
| BayesA1      | 0.388           | 0.010 | 0.488        | 0.015 | 0.342        | 0.020 | 0.305         | 0.018 |
| Lasso1       | 0.390           | 0.010 | 0.490        | 0.015 | 0.342        | 0.020 | 0.309         | 0.018 |
| Lasso2       | 0.390           | 0.010 | 0.490        | 0.015 | 0.342        | 0.020 | 0.309         | 0.018 |
| RR-BLUP      | 0.390           | 0.010 | 0.490        | 0.015 | 0.342        | 0.020 | 0.309         | 0.018 |
| GBLUP        | 0.398           | 0.010 | 0.497        | 0.014 | 0.347        | 0.019 | 0.323         | 0.017 |
| BLUP         | 0.257           | 0.010 | 0.406        | 0.015 | 0.160        | 0.025 | 0.094         | 0.028 |

| Method       | Trait 4         |       |              |       |              |       |               |       |
|--------------|-----------------|-------|--------------|-------|--------------|-------|---------------|-------|
|              | All Generations |       | Generation 6 |       | Generation 8 |       | Generation 10 |       |
|              | cor             | se    | cor          | se    | cor          | se    | cor           | se    |
| Mean Genomic | 0.448           | 0.016 | 0.559        | 0.013 | 0.409        | 0.016 | 0.339         | 0.021 |
| PLS          | 0.391           | 0.017 | 0.507        | 0.018 | 0.350        | 0.028 | 0.273         | 0.012 |

|           |       |       |       |       |       |       |       |       |
|-----------|-------|-------|-------|-------|-------|-------|-------|-------|
| BayesSSVS | 0.480 | 0.014 | 0.586 | 0.012 | 0.442 | 0.027 | 0.381 | 0.018 |
| BayesC    | 0.505 | 0.017 | 0.604 | 0.011 | 0.470 | 0.031 | 0.413 | 0.023 |
| BayesB1   | 0.504 | 0.016 | 0.605 | 0.012 | 0.466 | 0.029 | 0.416 | 0.022 |
| BayesA1   | 0.495 | 0.019 | 0.596 | 0.014 | 0.458 | 0.033 | 0.402 | 0.023 |
| Lasso1    | 0.412 | 0.017 | 0.532 | 0.018 | 0.372 | 0.027 | 0.289 | 0.014 |
| Lasso2    | 0.411 | 0.017 | 0.532 | 0.018 | 0.372 | 0.027 | 0.289 | 0.014 |
| RR-BLUP   | 0.413 | 0.017 | 0.533 | 0.018 | 0.373 | 0.027 | 0.290 | 0.014 |
| GBLUP     | 0.418 | 0.016 | 0.537 | 0.018 | 0.376 | 0.027 | 0.298 | 0.013 |
| BLUP      | 0.287 | 0.017 | 0.449 | 0.019 | 0.204 | 0.027 | 0.043 | 0.029 |

---
