# Supplementary material
Source: PubMed Central journal article supplement (PMC3567728)
Supplement: c3949254642dd96c0be27cc2125c017c_genetics.112.147983-1.pdf [file c3949254642dd96c0be27cc2125c017c_genetics.112.147983-1.pdf]

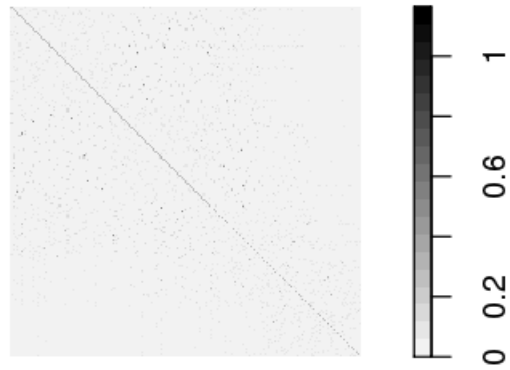

**Figure S1** Pedigree relationship heat map of the 2000 reference (top left) and 1500 validation (bottom left) individuals in replicate 1 of the simulated dataset

**Table S1 Accuracy of genomic prediction in simulated data estimated with different methods, where PLS is Partial Least Squares, BayesSSVS is Bayesian Stochastic Search Variable Selection, RR-BLUP is Ridge Regression, and BLUP (GBLUP) is (Genomic) Best Linear Unbiased Prediction.**

| Method       | Trait 1         |       |              |       |              |       |               |       |
|--------------|-----------------|-------|--------------|-------|--------------|-------|---------------|-------|
|              | All Generations |       | Generation 6 |       | Generation 8 |       | Generation 10 |       |
|              | cor             | se    | cor          | se    | cor          | se    | cor           | se    |
| Mean Genomic | 0.449           | 0.002 | 0.551        | 0.003 | 0.418        | 0.003 | 0.360         | 0.002 |
| PLS          | 0.431           | 0.011 | 0.530        | 0.011 | 0.398        | 0.016 | 0.348         | 0.015 |
| BayesSSVS    | 0.449           | 0.013 | 0.550        | 0.014 | 0.419        | 0.019 | 0.361         | 0.016 |
| BayesC       | 0.452           | 0.013 | 0.554        | 0.013 | 0.422        | 0.018 | 0.362         | 0.016 |
| BayesB1      | 0.451           | 0.013 | 0.553        | 0.012 | 0.420        | 0.018 | 0.362         | 0.016 |
| BayesA1      | 0.453           | 0.013 | 0.555        | 0.013 | 0.422        | 0.018 | 0.363         | 0.016 |
| Lasso1       | 0.453           | 0.013 | 0.555        | 0.013 | 0.422        | 0.018 | 0.363         | 0.016 |
| Lasso2       | 0.453           | 0.013 | 0.555        | 0.013 | 0.422        | 0.018 | 0.363         | 0.016 |
| RR-BLUP      | 0.453           | 0.013 | 0.555        | 0.013 | 0.422        | 0.018 | 0.363         | 0.016 |
| GBLUP        | 0.448           | 0.013 | 0.552        | 0.013 | 0.418        | 0.018 | 0.352         | 0.017 |
| BLUP         | 0.290           | 0.014 | 0.440        | 0.020 | 0.212        | 0.025 | 0.110         | 0.023 |

| Method       | Trait 2         |       |              |       |              |       |               |       |
|--------------|-----------------|-------|--------------|-------|--------------|-------|---------------|-------|
|              | All Generations |       | Generation 6 |       | Generation 8 |       | Generation 10 |       |
|              | cor             | se    | cor          | se    | cor          | se    | cor           | se    |
| Mean Genomic | 0.483           | 0.017 | 0.580        | 0.012 | 0.447        | 0.019 | 0.401         | 0.022 |
| PLS          | 0.424           | 0.011 | 0.527        | 0.014 | 0.387        | 0.021 | 0.331         | 0.016 |
| BayesSSVS    | 0.517           | 0.027 | 0.603        | 0.020 | 0.489        | 0.040 | 0.448         | 0.029 |
| BayesC       | 0.542           | 0.027 | 0.624        | 0.020 | 0.511        | 0.038 | 0.481         | 0.030 |
| BayesB1      | 0.544           | 0.027 | 0.624        | 0.021 | 0.517        | 0.038 | 0.482         | 0.029 |
| BayesA1      | 0.539           | 0.028 | 0.621        | 0.021 | 0.510        | 0.038 | 0.472         | 0.031 |
| Lasso1       | 0.447           | 0.013 | 0.558        | 0.012 | 0.405        | 0.023 | 0.352         | 0.017 |
| Lasso2       | 0.447           | 0.013 | 0.557        | 0.012 | 0.405        | 0.023 | 0.351         | 0.016 |
| RR-BLUP      | 0.447           | 0.016 | 0.558        | 0.013 | 0.405        | 0.026 | 0.354         | 0.020 |
| GBLUP        | 0.437           | 0.011 | 0.551        | 0.010 | 0.392        | 0.021 | 0.337         | 0.019 |
| BLUP         | 0.297           | 0.016 | 0.463        | 0.011 | 0.206        | 0.030 | 0.099         | 0.019 |

| Method       | Trait 3         |       |              |       |              |       |               |       |
|--------------|-----------------|-------|--------------|-------|--------------|-------|---------------|-------|
|              | All Generations |       | Generation 6 |       | Generation 8 |       | Generation 10 |       |
|              | cor             | se    | cor          | se    | cor          | se    | cor           | se    |
| Mean Genomic | 0.386           | 0.003 | 0.484        | 0.005 | 0.339        | 0.002 | 0.306         | 0.003 |
| PLS          | 0.366           | 0.009 | 0.447        | 0.016 | 0.325        | 0.018 | 0.304         | 0.018 |
| BayesSSVS    | 0.378           | 0.010 | 0.480        | 0.015 | 0.333        | 0.021 | 0.290         | 0.016 |
| BayesC       | 0.390           | 0.010 | 0.490        | 0.015 | 0.343        | 0.020 | 0.308         | 0.017 |
| BayesB1      | 0.383           | 0.009 | 0.483        | 0.015 | 0.338        | 0.020 | 0.298         | 0.015 |
| BayesA1      | 0.388           | 0.010 | 0.488        | 0.015 | 0.342        | 0.020 | 0.305         | 0.018 |
| Lasso1       | 0.390           | 0.010 | 0.490        | 0.015 | 0.342        | 0.020 | 0.309         | 0.018 |
| Lasso2       | 0.390           | 0.010 | 0.490        | 0.015 | 0.342        | 0.020 | 0.309         | 0.018 |
| RR-BLUP      | 0.390           | 0.010 | 0.490        | 0.015 | 0.342        | 0.020 | 0.309         | 0.018 |
| GBLUP        | 0.398           | 0.010 | 0.497        | 0.014 | 0.347        | 0.019 | 0.323         | 0.017 |
| BLUP         | 0.257           | 0.010 | 0.406        | 0.015 | 0.160        | 0.025 | 0.094         | 0.028 |

| Method       | Trait 4         |       |              |       |              |       |               |       |
|--------------|-----------------|-------|--------------|-------|--------------|-------|---------------|-------|
|              | All Generations |       | Generation 6 |       | Generation 8 |       | Generation 10 |       |
|              | cor             | se    | cor          | se    | cor          | se    | cor           | se    |
| Mean Genomic | 0.448           | 0.016 | 0.559        | 0.013 | 0.409        | 0.016 | 0.339         | 0.021 |
| PLS          | 0.391           | 0.017 | 0.507        | 0.018 | 0.350        | 0.028 | 0.273         | 0.012 |

|           |       |       |       |       |       |       |       |       |
|-----------|-------|-------|-------|-------|-------|-------|-------|-------|
| BayesSSVS | 0.480 | 0.014 | 0.586 | 0.012 | 0.442 | 0.027 | 0.381 | 0.018 |
| BayesC    | 0.505 | 0.017 | 0.604 | 0.011 | 0.470 | 0.031 | 0.413 | 0.023 |
| BayesB1   | 0.504 | 0.016 | 0.605 | 0.012 | 0.466 | 0.029 | 0.416 | 0.022 |
| BayesA1   | 0.495 | 0.019 | 0.596 | 0.014 | 0.458 | 0.033 | 0.402 | 0.023 |
| Lasso1    | 0.412 | 0.017 | 0.532 | 0.018 | 0.372 | 0.027 | 0.289 | 0.014 |
| Lasso2    | 0.411 | 0.017 | 0.532 | 0.018 | 0.372 | 0.027 | 0.289 | 0.014 |
| RR-BLUP   | 0.413 | 0.017 | 0.533 | 0.018 | 0.373 | 0.027 | 0.290 | 0.014 |
| GBLUP     | 0.418 | 0.016 | 0.537 | 0.018 | 0.376 | 0.027 | 0.298 | 0.013 |
| BLUP      | 0.287 | 0.017 | 0.449 | 0.019 | 0.204 | 0.027 | 0.043 | 0.029 |

---

**Table S2 Slope of regression of true on predicted breeding values in simulated data estimated with different methods, where PLS is Partial Least Squares, BayesSSVS is Bayesian Stochastic Search Variable Selection, RR-BLUP is Ridge Regression, and BLUP (GBLUP) is Genomic Best Linear Unbiased Prediction.**

|           |      | Trait 1         |       |              |       |              |       |               |       |
|-----------|------|-----------------|-------|--------------|-------|--------------|-------|---------------|-------|
|           |      | All Generations |       | Generation 6 |       | Generation 8 |       | Generation 10 |       |
| Method    | Mean | slope           | se    | slope        | se    | slope        | se    | slope         | se    |
| Genomic   |      | 1.028           | 0.065 | 1.023        | 0.065 | 1.057        | 0.067 | 1.008         | 0.063 |
| PLS       |      | 0.519           | 0.014 | 0.513        | 0.015 | 0.534        | 0.019 | 0.519         | 0.023 |
| BayesSSVS |      | 1.202           | 0.068 | 1.186        | 0.058 | 1.243        | 0.078 | 1.192         | 0.089 |
| BayesC    |      | 1.057           | 0.044 | 1.058        | 0.040 | 1.083        | 0.051 | 1.030         | 0.058 |
| BayesB1   |      | 1.062           | 0.043 | 1.063        | 0.038 | 1.087        | 0.050 | 1.035         | 0.058 |
| BayesA1   |      | 1.071           | 0.045 | 1.071        | 0.041 | 1.096        | 0.050 | 1.046         | 0.057 |
| Lasso1    |      | 1.085           | 0.047 | 1.083        | 0.041 | 1.112        | 0.054 | 1.061         | 0.062 |
| Lasso2    |      | 1.078           | 0.044 | 1.076        | 0.038 | 1.105        | 0.052 | 1.053         | 0.060 |
| RR-BLUP   |      | 1.082           | 0.044 | 1.080        | 0.040 | 1.109        | 0.052 | 1.059         | 0.059 |
| GBLUP     |      | 1.093           | 0.048 | 1.074        | 0.041 | 1.140        | 0.056 | 1.081         | 0.067 |
| BLUP      |      | 1.018           | 0.057 | 1.002        | 0.044 | 1.036        | 0.133 | 1.059         | 0.212 |

  

|           |      | Trait 2         |       |              |       |              |       |               |       |
|-----------|------|-----------------|-------|--------------|-------|--------------|-------|---------------|-------|
|           |      | All Generations |       | Generation 6 |       | Generation 8 |       | Generation 10 |       |
| Method    | Mean | slope           | se    | slope        | se    | slope        | se    | slope         | se    |
| Genomic   |      | 0.961           | 0.059 | 0.953        | 0.059 | 0.958        | 0.058 | 0.966         | 0.061 |
| PLS       |      | 0.503           | 0.013 | 0.493        | 0.015 | 0.511        | 0.032 | 0.504         | 0.026 |
| BayesSSVS |      | 1.006           | 0.095 | 0.981        | 0.077 | 1.012        | 0.110 | 1.038         | 0.124 |
| BayesC    |      | 1.039           | 0.049 | 1.022        | 0.036 | 1.036        | 0.064 | 1.066         | 0.077 |
| BayesB1   |      | 1.049           | 0.041 | 1.031        | 0.030 | 1.051        | 0.059 | 1.072         | 0.065 |
| BayesA1   |      | 1.051           | 0.043 | 1.030        | 0.030 | 1.054        | 0.062 | 1.070         | 0.068 |
| Lasso1    |      | 1.032           | 0.045 | 1.035        | 0.031 | 1.020        | 0.063 | 1.015         | 0.084 |
| Lasso2    |      | 1.040           | 0.044 | 1.044        | 0.032 | 1.028        | 0.060 | 1.022         | 0.081 |
| RR-BLUP   |      | 0.902           | 0.078 | 0.915        | 0.062 | 0.886        | 0.091 | 0.883         | 0.111 |
| GBLUP     |      | 1.030           | 0.045 | 1.021        | 0.031 | 1.029        | 0.064 | 1.028         | 0.096 |
| BLUP      |      | 1.041           | 0.051 | 1.059        | 0.048 | 0.960        | 0.114 | 0.880         | 0.149 |

  

|           |      | Trait 3         |       |              |       |              |       |               |       |
|-----------|------|-----------------|-------|--------------|-------|--------------|-------|---------------|-------|
|           |      | All Generations |       | Generation 6 |       | Generation 8 |       | Generation 10 |       |
| Method    | Mean | slope           | se    | slope        | se    | slope        | se    | slope         | se    |
| Genomic   |      | 0.887           | 0.058 | 0.912        | 0.061 | 0.854        | 0.056 | 0.871         | 0.055 |
| PLS       |      | 0.429           | 0.013 | 0.429        | 0.019 | 0.413        | 0.024 | 0.449         | 0.031 |
| BayesSSVS |      | 0.988           | 0.062 | 1.030        | 0.049 | 0.963        | 0.107 | 0.932         | 0.077 |
| BayesC    |      | 0.924           | 0.042 | 0.953        | 0.039 | 0.888        | 0.081 | 0.901         | 0.059 |
| BayesB1   |      | 0.902           | 0.043 | 0.942        | 0.041 | 0.870        | 0.083 | 0.854         | 0.046 |
| BayesA1   |      | 0.923           | 0.046 | 0.954        | 0.039 | 0.892        | 0.085 | 0.894         | 0.067 |
| Lasso1    |      | 0.949           | 0.043 | 0.977        | 0.040 | 0.910        | 0.082 | 0.932         | 0.065 |
| Lasso2    |      | 0.946           | 0.041 | 0.973        | 0.038 | 0.906        | 0.080 | 0.931         | 0.063 |
| RR-BLUP   |      | 0.946           | 0.045 | 0.973        | 0.041 | 0.908        | 0.082 | 0.931         | 0.068 |
| GBLUP     |      | 0.973           | 0.042 | 0.973        | 0.036 | 0.934        | 0.078 | 1.017         | 0.065 |
| BLUP      |      | 0.896           | 0.053 | 0.925        | 0.036 | 0.764        | 0.132 | 0.951         | 0.289 |

| Method    | Trait 4         |       |              |       |              |       |               |       |
|-----------|-----------------|-------|--------------|-------|--------------|-------|---------------|-------|
|           | All Generations |       | Generation 6 |       | Generation 8 |       | Generation 10 |       |
| Mean      | slope           | se    | slope        | se    | slope        | se    | slope         | se    |
| Genomic   | 0.929           | 0.061 | 0.985        | 0.064 | 0.893        | 0.058 | 0.855         | 0.059 |
| PLS       | 0.454           | 0.026 | 0.481        | 0.022 | 0.440        | 0.044 | 0.410         | 0.027 |
| BayesSSVS | 1.091           | 0.056 | 1.142        | 0.067 | 1.055        | 0.072 | 1.033         | 0.055 |
| BayesC    | 0.960           | 0.038 | 1.014        | 0.042 | 0.931        | 0.061 | 0.894         | 0.035 |
| BayesB1   | 0.963           | 0.035 | 1.019        | 0.040 | 0.929        | 0.063 | 0.903         | 0.034 |
| BayesA1   | 1.005           | 0.036 | 1.050        | 0.047 | 0.968        | 0.059 | 0.959         | 0.039 |
| Lasso1    | 0.969           | 0.043 | 1.043        | 0.056 | 0.925        | 0.059 | 0.862         | 0.048 |
| Lasso2    | 0.967           | 0.049 | 1.041        | 0.061 | 0.925        | 0.067 | 0.858         | 0.050 |
| RR-BLUP   | 0.968           | 0.041 | 1.041        | 0.054 | 0.925        | 0.059 | 0.863         | 0.048 |
| GBLUP     | 0.981           | 0.040 | 1.030        | 0.053 | 0.942        | 0.059 | 0.910         | 0.038 |
| BLUP      | 0.966           | 0.053 | 1.020        | 0.053 | 0.895        | 0.119 | 0.287         | 0.259 |

**Table S3 Length of chains, burn-in and hyper-parameters for Bayesian methods.**

| Method    | Length of Chain       | Burn-in            | $\pi$     | Effect dist. and parameters                           |
|-----------|-----------------------|--------------------|-----------|-------------------------------------------------------|
| BayesSSVS | 100,000               | 10,000             | 0.999     | Normal<br>Var estimated                               |
| BayesC    | 160,000<br>5,200,000* | 30,000<br>200,000* | Estimated | Normal<br>Var estimated                               |
| BayesB1   | 160,000<br>5,200,000* | 30,000<br>200,000* | Estimated | Scaled Student-t<br>df= estimated<br>Scale= estimated |
| BayesB2   | 5,200,000*            | 200,000*           | estimated | Scaled Student-t<br>df=4<br>Scale= estimated          |
| BayesA1   | 160,000               | 30,000             | -         | Scaled Student-t<br>df= estimated<br>Scale= estimated |
| BayesA2   | 5,200,000*            | 200,000*           | -         | Scaled Student-t<br>df= 4<br>Scale= estimated         |
| Lasso1    | 160,000<br>5,200,000* | 30,000<br>200,000* | -         | Laplace<br>rate=estimated                             |
| Lasso2    | 100,000               | 10,000             | -         | Laplace                                               |
| RR-BLUP   | 100,000               | 10,000             | 0.0       | Normal<br>Var estimated                               |

\* chain used for analysis of pine and wheat dataset
